# Supplementary material for: Comparison of the Effectiveness and Safety of Heterologous Booster Doses with Homologous Booster Doses for SARS-CoV-2 Vaccines: A Systematic Review and Meta-Analysis
Source: Int J Environ Res Public Health. 2022 Aug 29;19(17):10752. doi: 10.3390/ijerph191710752 (PMC9517782; doi:10.3390/ijerph191710752)
Supplement: Supplementary file 1 [file ijerph-19-10752-s001.zip › supplementary table S1.xlsx]

## Sheet: supplementary table S1
Supplementary table 1. Characteristics of the included studies
Record number	The first author	Published time	Article type	Study design	Study region	Criteria for inclusion of subjects	Population size	Group of homologous booster dose	Group of heterologous booster dose	Sex ratio (F/M)	Median/Average age	Median/Average age (homologous booster dose)	Median/Average age (heterologous booster dose)	Underlying disease	Prime immune condition	Booster dose	Immune condition of homologous booster dose group	Immune condition of heterologous booster dose group
1	Atmar, R. L.	2021.1	Preprint	Phase 1/2 clinical trial	America	Healthy adults who had received a Covid-19 vaccine available under EUA (Ad26.COV2.S [Janssen], mRNA-1273 [Moderna, Inc], or BNT162b2 [Pfizer/BioNTech]) at least 12 weeks earlier and reported no prior history of SARS-CoV-2 infection or monoclonal antibody infusion.	154	101	53	87/67	54.9	-	-	-	2 dose of Ad26.COV2-S (53), 2 dose of mRNA-1273 (51), or 2 dose of BNT162b2 (50)	mRNA-1273	mRNA vaccine *3	adenovirus vector vaccine*2+mRNA vaccine*1
							150	50	100	66/84	50.1	-	-	-	2 dose of Ad26.COV2-S (50), 2 dose of mRNA-1273 (48), or 2 dose of BNT162b2 (51)	Ad26.COV2-S	adenovirus vector vaccine*3	mRNA vaccine*2+adenovirus vector vaccine*1
							154	101	52	78/76	50.8	-	-	-	2 dose of Ad26.COV2-S (53), 2 dose of mRNA-1273 (51), or 2 dose of BNT162b2 (50)	BNT162b2	mRNA vaccine *3	adenovirus vector vaccine*2+mRNA vaccine*1
2	Ai, J.	2022.01	Published article	Prospective cohort study	China	-	20	10	10	8/12	-	27	24.5	1 arrhythmia	2 doses of BBIBP-CorV	BBIBP-CorV or ZF2001	inactivated vaccine*3	mRNA vaccine*2+recombinant protein vaccine
3	Reindl-Schwaighofer, R.	2022.02	Published article	Randomized clinical trial	Austria	KTRs without detectable SARS-CoV-2 spike protein antibodies 4 or more weeks after the second dose of an mRNA vaccine	197	99	98	82/115	61.2	-	-	197 kidney transplant recipients	2 dose of mRNA vaccines (BNT162b2 or mRNA-1273)	BNT162b2, mRNA-1273, or Ad26COVS1	mRNA vaccine *3	mRNA vaccine*2+adenovirus vector vaccine*1
4	Costa Clemens, S. A.	2022.02	Published article	Phase 4 randomised study	Brazil	18 years or older; had received their second doses of CoronaVac 182 days (plus or minus 30 days) before enrolment; female participants were not pregnant, puerperal, or nursing	872	281	591	525/347	61	58	60	54 type 2 diabetes, 4 heart failure, 6 COPD, 182 hypertension, 61 cancer, 2 immunosuppressed , 4 chronic kidney disease, 37 coronary artery disease, 4 cardiomyopathy, 1 sickle cell anaemia, 2 HIV	2 doses of CoronaVac	Ad26.COV2-S, ChAdOx1 nCoV- or CoronaVac	inactivated vaccine*3	inactivated vaccine*2+adenovirus vector vaccine*1
							614	281	333	369/245		58	61	106 Type 2 diabetes, 8 Heart failure, 7 COPD, 274 Hypertension, 93 cancer, 1 Immunosuppressed , 6 Chronic kidney disease, 43 Coronary artery disease, 4 Cardiomyopathy, 0 Sickle cell anaemia, 0 HIV	2 doses of CoronaVac	BNT162b2 or CoronaVac	inactivated vaccine*3	inactivated vaccine*2+mRNA vaccine*1
5	Li, J.	2022.01	Published article	Phase 4 randomized trial	China	Individuals aged between 18 and 75 years who had received one dose of CoronaVac in the past 1–3 months or two doses of CoronaVac in the past 3–6 months. Individuals with a previous COVID-19 diagnosis or confirmed SARS-CoV-2 infection and pregnant women were excluded from this study (Methods).	198	102	96	76/124	-	47	47	-	2 doses of CoronaVac	CoronaVac or Convidecia	inactivated vaccine*3	inactivated vaccine*2+adenovirus vector vaccine*1
6	Natarajan, K.	2022.04	Published article	-	America	-	537	164	373	278/259	-	-	-	-	1 dose of Ad26.COV2-S	Ad26.COV2-S or mRNA vaccine	adenovirus vector vaccine*2	adenovirus vector vaccine*1+mRNA vaccine*1
							8205	7832	373	4309/3895	-	-	-	-	1 dose of Ad26.COV2-S, or 2 doses of mRNA vaccines	Ad26.COV2-S or mRNA vaccine	mRNA vaccine *3	adenovirus vector vaccine*1+mRNA vaccine*1
7	Jara, A.	2022.01	Published article	Prospective cohort study	Chile	-	2206206	186946	2019260	1359838/846369	47.25	69.6	45.18	-	2 doses of CornaVac	CornaVac or BNT162b2	inactivated vaccine*3	inactivated vaccine*2+mRNA vaccine*1
							2108286	186946	1921340	1189876/918410	68.15	69.6	68	-	2 doses of CornaVac	CornaVac or AZD1222	inactivated vaccine*3	inactivated vaccine*2+adenovirus vector vaccine*1
8	Sablerolles, R. S. G.	2022.01	Published article	Randomized controlled trial	Netherlands	Participants between 18 and 65 years of age and did not have severe coexisting factors or conditions (e.g., receipt of treatment for cancer, use of immunosuppressant agents, dependence on dialysis, or receipt of a solid-organ or bone marrow transplant) or a history of SARS-CoV-2 infection (either laboratory-confirmed or reported by the participant)	329	106	223	211/118	40.5	41	mRNA 1273 40.5; BNT 162b2 38.0	5 cardiovascular disease, 7 pulmonary disease, 2 diabetes mellitus, 2 liver disease, 2 kidney disease	2 doses of Ad26.COV2.S	Ad26.COV2.S, mRNA 1273 or BNT 162b2	adenovirus vector vaccine*2	adenovirus vector vaccine*1+mRNA vaccine*1
9	Lai, K. T.	2022.04	Published article	Open label trial	Hong Kong	Individuals completed with two doses of COVID vaccine (CoronaVac, or BBIBP-CoR V) and were negative for the neutralizing antibody (NAb)	234	98	136	112/122	56.35	54.08	57.98	14 cardiovascular diseases, 1 stroke, 65 hypertension, 23 diabetes mellitus, 44 hyperlipidemia, 4 asthma, 1 chronic renal diseases, 3 chronic liver diseases, 15 cancer, 0 received chemotherapy and/or radiotherapy, 6 steroid, 0 AIDS, 1 systemic lupus erythematosus, 9 other autoimmune diseases, 0 food/drug allergy	2 doses of CoronaVac or 2 doses of BBIBP-CoR V	CoronaVac or BNT162b2	inactivated vaccine*3	inactivated vaccine*2+mRNA vaccine*1
10	Menni, C.	2022.04	Published article	Prospective cohort study	UK	-	296084	141496	154588	-	-	-	-	-	2 doses of ChadOx1 nCoV-19 or 2 doses of BNT16b12	mRNA1273 or BNT16b12	mRNA vaccine *3	adenovirus vector vaccine*1+mRNA vaccine*1
11	Khong, K. W.	2022.02	Published article	Prospective cohort study	Hong Kong	-	32	24	8	17/15	-	-	58.5	11 ≥1comorbidity	2 doses of BNT162b2, or 2 doses of CoronaVac	BNT162b2 or CoronaVac	mRNA vaccine *3, or inactivated vaccine*3	inactivated vaccine*2+mRNA vaccine*1
12	Çağlayan, D.	2022.02	Published article	Prospective cohort study	Turkey	Healthcare workers were included in the study if they had received two doses of the Coronavac vaccine, 28 days apart, and excluded if they had been diagnosed with COVID‐19 at any time before the study period.	293	25	268	-		-	-	146/548 ≥1 chronic disease	2 doses of CoronaVac	CoronaVac or BNT162b2	inactivated vaccine*3	inactivated vaccine*2+mRNA vaccine*1
13	Bonelli, Michael	2022.03	Published article	Randomised controlled trial	-	Adults (≥18 years) with chronic inflammatory rheumatic or neurologic diseases under current rituximab therapy and without detectable SARS-CoV-2 spike (S) protein antibodies at least 4 weeks after their second standard vaccination with an mRNA vaccine (BNT162b2 or mRNA-1273) were included. Key exclusion criteria were previous infection with SARS-CoV-2 or known allergies to study compounds.	55	28	27	41/14	-	58.9	60.9	21 Arthritis, 16 Connective tissue diseases, 8 Vasculitis, 6 Multiple sclerosis, 4 IgG4-related disease	2 doses of mRNA vaccines (BNT16b12 or mRNA 1273)	BNT162b2, mRNA-1273, or ChAdOx1 nCoV-19	mRNA vaccine *3	mRNA vaccine*2+adenovirus vector vaccine*1
14	Heinzel, A.	2022.02	Preprint	Randomized controlled trial	Vienna	Kidney transplant recipients who did not develop SARS-CoV-2 spike protein antibodies following two doses of an mRNA vaccine	169	85	84	71/98	61	61	61	169 kidney transplant recipients	2 doses of mRNA vaccines (BNT16b12 or mRNA 1273)	BNT162b2, mRNA-1273, or Ad26COVS1	mRNA vaccine *3	mRNA vaccine*2+adenovirus vector vaccine*1
15	Angkasekwinai, N.	2022.02	Preprint	Prospective cohort study	Thailand	The eligible participants were those who have received either 2 doses of CoronaVac (4 weeks apart) (CoronaVac-prime) or ChAdOx1 (8-10 weeks apart) (ChAdOx1-prime) primary series vaccination 8-12 weeks prior to recruitment. The exclusion criteria were history of SARS-CoV-2 infection; prior received prophylactic or investigational treatment against COVID-19 within 90 days; had an unstable underlyin…	79	14	65	63/16	-	31	36.6	-	2 doses of CornaVac	BBIBPor ChAdOx1 nCoV-19	inactivated vaccine*3	inactivated vaccine*2+adenovirus vector vaccine*1
							64	14	50	52/12	-	31	32	-	2 doses of CornaVac	BBIBP or BNT16b12	inactivated vaccine*3	inactivated vaccine*2+mRNA vaccine*1
							73	50	23	69/4	-	45.5	51	-	2 doses of ChadOx1 nCoV-19	ChadOx or BBIBP	adenovirus vector vaccine*3	adenovirus vector vaccine*2+inactivated vaccine*1
							100	50	50	84/16	-	45.5	34	-	2 doses of ChadOx1 nCoV-19	ChadOx or BNT16b12
16	Mok, C. K. P.	2021.11	Preprint	Prospective cohort study	Hong Kong, China	Healthy adults aged between 19-77 years old who had received two doses of CoronaVac	80	40	40	52/28	-	51.5	51.2	3 cardiovascular diseases, 4 diabetes, 4 chronic respiratory disease	2 doses of CoronaVac	CoronaVac or BNT162b2	inactivated vaccine*3	inactivated vaccine*2+mRNA vaccine*1
17	Zhang, Zhe	2022.03	Preprint	Open and parallel-controlled study	China	All participants who received two doses of inactivated vaccine (CoronaVac or BBIBP-CorV (Sinopharm), or the mixed CoronaVac and BBIBP-CorV) 6 months prior were enrolled in this study.	452	223	229	-	-	-	-	-	2 doses of inactivated vaccines (CoronaVac or BBIBP-CorV)	Ad26COVS1 or Coronavac	inactivated vaccine*3	inactivated vaccine*2+adenovirus vector vaccine*1
					China	All participants who received two doses of inactivated vaccine (CoronaVac or BBIBP-CorV (Sinopharm), or the mixed CoronaVac and BBIBP-CorV) 6 months prior were enrolled in this study.	442	223	219	-	-	-	-	-	2 doses of CoronaVac (65.4%), BBIBP-CorV (23.3%), or the mixed CoronaVac and BBIBP-CorV (11.3%)	CoronaVac or ZF2001	inactivated vaccine*3	inactivated vaccine*2+adenovirus vector vaccine*1
18	Kaabi, Nawal Al	2022.03	Preprint	Phase 2 randomized controlled trial	United Arab Emirates	Healthy adults aged ≥18 years who had received two doses of BBIBP-CorV > 4 months before were eligible. Confirmed, suspected or asymptomatic COVID-19 cases, individuals with a history of SARS or MERS infections, and those vaccinated with any other COVID-19 vaccines were excluded.	574	289	285	8/566	35.13	33.85	35.13	-	2 doses of BBIBP-CorV	BBIBP-CorV or NVSI06-08	inactivated vaccine*3	inactivated vaccine*2+recombinant protein vaccine*1
							540	270	270	22/518	34.7	34.13	33.84	-	2 doses of BBIBP-CorV	BBIBP-CorV or NVSI06-08	inactivated vaccine*3	inactivated vaccine*2+recombinant protein vaccine*1
							564	278	286	15/549	37.01	36.77	36.41	-	2 doses of BBIBP-CorV	BBIBP-CorV or NVSI06-08	inactivated vaccine*3	inactivated vaccine*2+recombinant protein vaccine*1
19	Starrfelt, J.	2022.03	Preprint	Cohort study	Norway	-	-	-	-	-	-	-	-	-	2 doses of Comirnaty	Comirnaty	mRNA vaccine *3	-
							-	-	-	-	-	-	-	-	2 doses of Comirnaty	Spikevax	mRNA vaccine *3	-
							-	-	-	-	-	-	-	-	2 doses of Spikevax	Spikevax	mRNA vaccine *3	-
							-	-	-	-	-	-	-	-	2 doses of Spikevax	Comirnaty	mRNA vaccine *3	-
20	Toledo-Romani, M. E.	2021.10	Preprint	Phase 3 randomized controlled trial	-	-	14677	-	14677	7746/6931	49	-	49	6042 at least 1 comorbidity	Two doses of SOBERANA 02	SOBERANA Plus
21	Ranzani, Otavio T.	2022.03	Preprint	Case control study	Brazil	-	871681	58857	812824	-	-	-	-	-	2 doses of CoronaVac	CoronaVac or BNT162b2	inactivated vaccine*3	inactivated vaccine*2+mRNA vaccine*1
22	Andrews, Nick	2022.03	Published article	Case control study	England	-	810486	393937	416549	-	-	-	-	-	2 doses of ChadOx1 nCoV-19 or BNT16b12	BNT16b12	mRNA vaccine*3	adenovirus vector vaccine*2+mRNA vaccine*1
23	Baum, Ulrike	2022.03	Preprint	Cohort study	Finland	-	747486	747486	-	-	-	-	-	-	2 doses of Comirnaty	Comirnaty	mRNA vaccine *3	-
